1 **Title:** Novitski's Distal Shift in Paracentric Inversion Evolution

2 **Author Name:** Spencer A. Koury

3 **Affiliation:** Department of Ecology and Evolution, Stony Brook University

4 **Address:** 650 Life Sciences Building

5 100 Nichols Road, Stony Brook, NY 11794

6

7 **Abstract:** In *Drosophila pseudoobscura* younger chromosomal inversions tend to be found  
8 distal to older inversions. By examining phylogenetic series of overlapping  
9 inversions for 134 gene arrangements of 13 chromosomes this pattern was  
10 extended to five additional *Drosophila* species. This distinct pattern arose  
11 repeatedly and independently in all six species and likely reflects an underlying  
12 principle of chromosome evolution. In this study it is illustrated how  
13 transmission of distal inversions is *always* favored in female meiosis when  
14 crossing over in homosequential regions of overlapping inversions generates  
15 asymmetric dyads. This cytogenetic mechanism for female meiotic drive is  
16 described in detail and advanced as an explanation for the distal shift in  
17 phylogenetic series of overlapping inversions as well as several better known  
18 patterns in the evolution of serially inverted chromosomes.

19

20 **Keywords:** Chromosome Evolution, Meiotic Drive, Nonrandom Disjunction, Inversion

21

22

23

24 INTRODUCTION

25 The study of *Drosophila* chromosomal inversion polymorphism emerged as model  
26 system for evolutionary genetics in the 1930's and played a major role in the Modern Synthesis  
27 (Krimbas and Powell, 1992). Interest in inversions started to wane in the 1960's with the  
28 appearance of genetic markers, such as allozymes, that could be more readily applied to many  
29 other organisms. However, beginning in the 1990's, application of sequencing technology in  
30 natural population genetics led to the discovery of inversions in several non-model organisms  
31 and a renaissance in both empirical and theoretical research on inversion polymorphism and its  
32 role in adaptation and speciation (Jones *et al.*, 2012; Kirkpatrick and Barton, 2006; Le Poul *et*  
33 *al.*, 2014; Lowry and Willis, 2010). Clearly, inversion polymorphism is an aspect of structural  
34 genome evolution in more than just *Drosophila*. However, for the investigation of nuanced  
35 patterns and mechanisms in chromosome evolution the knowledge base developed in *Drosophila*  
36 cytogenetics remains indispensable (Corbett-Detig and Hartl, 2012; Schaeffer *et al.*, 2008). As  
37 information on inversion polymorphism accumulates in the post-genomic era, early studies of  
38 chromosomal rearrangements in model systems will play a fundamental role in organizing these  
39 abundant data to uncover the principles of chromosome evolution (Bhutkar *et al.*, 2008; Gong *et*  
40 *al.*, 2005; Ranz *et al.*, 2007).

41 Inversion polymorphism in *Drosophila* was the first genetic marker system studied for  
42 phylogenetic inference and natural population genetics. Central to this research was Alfred  
43 Sturtevant, who first discovered chromosomal inversions, their effects in transmission genetics,  
44 and described natural variation in several species (Sturtevant and Novitski, 1941; Sturtevant,  
45 1917; Sturtevant, 1921; Sturtevant and Beadle, 1936; Sturtevant and Dobzhansky, 1936). In  
46 1936, Sturtevant proposed to make inversion polymorphism in *D. pseudoobscura* a model

47 system for evolutionary biology through collaboration with Theodosius Dobzhansky and Sewall  
48 Wright (Provine, 1981). From this collaboration came the first phylogenetic series of  
49 overlapping inversions (figure 1), and would for the next four decades be expanded by  
50 Dobzhansky *et alia* into the Genetics of Natural Populations I-XLIII (Dobzhansky and  
51 Sturtevant, 1938; Lewontin, 1981).

52         Despite this impressive scientific history, the mechanisms governing inversion origin,  
53 establishment, and maintenance remain obscure. The experimental study of spontaneous  
54 mutation of inversions and their invasion in populations is logistically difficult, if not impossible,  
55 and thus remains underexplored (Krimbas and Powell, 1992; Yamaguchi and Mukai, 1974).  
56 Balancing selection (associative overdominance, multiple niche, *etc.*) has long been favored in  
57 the maintenance of inversion polymorphism and has been variously supported by sampling  
58 natural populations as well as population cage and field experiments (Dobzhansky, 1948;  
59 Levitan and Etges, 2009; Schaeffer, 2008; Wright and Dobzhansky, 1946). However,  
60 experimental efforts on all fronts are intrinsically biased by the idiosyncrasies of chromosomal  
61 breakages and linked genetic backgrounds for the small handful of common inversions that  
62 provide the genetic material for analysis (*e.g.* Dobzhansky, 1950; Levitan, 1962; Yamaguchi and  
63 Mukai, 1974).

64         In contrast, non-experimental methods such as direct sequencing of inversion  
65 breakpoints and surveys of molecular diversity in inverted regions have provided a historical  
66 perspective on the origin of the common inversions. Common cosmopolitan inversions of *D.*  
67 *melanogaster* have reduced levels of polymorphism and originated relatively recently, on the  
68 order of 100,000 years ago (Andolfatto *et al.*, 1999; Corbett-Detig and Hartl, 2012; Hasson and  
69 Eanes, 1996; Matzkin *et al.*, 2005; Wesley and Eanes, 1994). Similar patterns are observed for

70 the serially inverted third chromosome of *D. pseudoobscura*, where the long and complex history  
71 of local adaptation and selection of epistatic effects have shaped the molecular diversity among  
72 gene arrangements (Fuller *et al.*, 2016; Schaeffer, 2008; Schaeffer *et al.*, 2003; Wallace *et al.*,  
73 2011; Wallace *et al.*, 2013). However, the discovery that common inversions from several  
74 species exhibit long range linkage disequilibrium, epistatic fitness effects, and are associated  
75 with meiotic drive renews concerns about drawing inferences from the exclusive study of this  
76 relatively small sample of inversion polymorphism (Corbett-Detig and Hartl, 2012; Houle and  
77 Márquez, 2015; Schaeffer *et al.*, 2003).

78 A long standing hypothesis that inversions result from ectopic recombination of  
79 transposable elements or other repetitive sequence found little support in the first polymorphic  
80 inversion breakpoints to be directly sequenced, *D. melanogaster*'s *In(3L)P*, *In(2L)t*, and *In(3R)P*  
81 (Andolfatto *et al.*, 1999; Matzkin *et al.*, 2005; Wesley and Eanes, 1994). Outside of *D.*  
82 *melanogaster*, there is both direct (Cáceres *et al.*, 1999b) and indirect (Orengo *et al.*, 2015)  
83 support of this mechanism. However, in 29 fixed inversions in the *melanogaster* group, Ranz *et*  
84 *al.* (2007) found only two instances of inverted repetitive sequences that would even allow this  
85 mechanism to operate. Complicating this historical analysis is the tendency for transposable  
86 elements to accumulate on the minority arrangements (Eanes *et al.*, 1992; Sniegowski and  
87 Charlesworth, 1994), and the possibility of transposable element remnants eroding over time  
88 (Puerma *et al.*, 2014; Ranz *et al.*, 2007). No unified characterization of inversion breakpoints, or  
89 the mechanisms governing the process, has emerged as the breakpoints studied have ranged from  
90 simple “cut and paste” to complex rearrangements including small inverted duplications and  
91 deletions (Cáceres *et al.*, 1999a; Ranz *et al.*, 2007; Wesley and Eanes, 1994).

92           Beyond the molecular characterization, the cytological study of inversion breakpoints  
93 along chromosome arms can also provide information about mechanisms controlling inversion  
94 polymorphism. The standard null distribution would assume inversions result from a rejoining of  
95 two chromosomal breakages that occur with uniform probability along the chromosome (Van  
96 Valen and Levins, 1968). When compared to this null distribution, breakpoints of a given  
97 inversion are observed to be further apart than expected, creating a deficiency of small inversions  
98 (*e.g.* Brehm and Krimbas, 1991). When comparing breakpoints *among* inversions, the  
99 breakpoints tend to be grouped closer together than expected creating extensive overlap of  
100 chromosomal inversions (Novitski, 1946). Finally, rather than the expected uniform distribution,  
101 serially inverted chromosomes tend to have inversion breakpoints clustered in distal regions of  
102 chromosome arms (Novitski, 1946).

103           Using the direct ancestor-descendant relationships of gene arrangements within species to  
104 generate phylogenetic series, it can be shown that breakpoints of derived inversions tend to lie  
105 distal of the corresponding inversion breakpoints in the ancestral arrangement (Novitski, 1946;  
106 Sturtevant and Dobzhansky, 1936). The telomeric progression of overlapping rearrangements  
107 for serially inverted chromosomes is called Novitski's distal shift, because this little-known rule  
108 of chromosome evolution was first described by Ed Novitski with cytogenetic evidence from  
109 Muller element *C* of *Drosophila pseudoobscura* (Krimbas and Powell, 1992; Novitski, 1946).  
110 To extend the observation of Novitski's distal shift, I examined published data from 28  
111 phylogenetic series for 13 different chromosomes in six *Drosophila* species of the *obscura*  
112 group. Each phylogenetic series arose independently in each species and represents the direct  
113 ancestor-descendent relationship in paracentric inversion evolution. Having validated the distal  
114 shift empirically, I propose a meiotic drive mechanism for the evolution of overlapping

115 chromosomal inversions that explains the progressive distal shift towards the telomere. I discuss  
116 difficulties in extending this mechanism to serially inverted chromosomes and suggest the same  
117 mechanism is the cause of other notable patterns in paracentric inversion evolution.

118

## 119 MATERIALS AND METHODS

120 The cytogenetics for sixteen *Drosophila* species in the *obscura* group have been  
121 published. Although most species in this group have extensive inversion polymorphism, only six  
122 species had sufficient data (multiple overlapping rearrangements) to allow the construction of  
123 phylogenies for overlapping paracentric inversions. Inversion phylogenies are unrooted trees.  
124 Incorporating information on arrangement frequency, geographical distribution, and the  
125 karyotype of interspecific hybrids, consensus ancestral arrangements (often designated  
126 “Standard”) are used to polarize inversion phylogenies. Note, arrangements other than the  
127 Standard may have been ancestral, as proposed for two chromosomes in *D. subobscura* and  
128 demonstrated with molecular variation for *D. pseudoobscura* (Krimbas, 1992; Wallace *et al.*,  
129 2011). The first gene rearrangement in a phylogenetic series is designated as the “series  
130 originating inversion.” An inversion’s rank in a phylogenetic series was recorded as the minimal  
131 number of inversion back steps required to obtain the ancestral arrangement. Species and  
132 chromosome information for the 28 phylogenetic series of overlapping inversions used in this  
133 paper are listed in table 1 with a sample series illustrated in figure 1 (see supplementary figure 1  
134 for dataset from all series)

135 To quantify the distal shift, the cytogenetic location of breakpoints were converted to a  
136 numerical value where the centromere position was zero and each successive cytogenetically  
137 discernable region is considered one unit distal. Where ambiguity exists for an inversion

138 breakpoint location, the midpoint of the range indicated was taken. To facilitate comparison  
139 across chromosomes and species, the scale for each chromosome was standardized to 100 unit  
140 lengths. This quantification does not necessarily correspond to a linear function of physical  
141 distance (bp) or genetic distance (cM), but it does assign a value between 0-100 for every  
142 inversion breakpoint and represents its cytogenetic location on the chromosome relative to the  
143 centromere. Inversion breakpoints location on this scale must be determined based on the  
144 arrangement upon which that new inversion first arose, not necessarily on the standard  
145 arrangement scale that is often reported in the literature. Similarly, inversion size was estimated  
146 as the distance between proximal and distal inversion breakpoints on the gene arrangement upon  
147 which it first occurred. Thus breakpoint location, inversion size, and phylogenetic rank for a  
148 given inversion are not obvious from casual observation and these data are provided in  
149 supplemental table 1.

150 To test the distal shift, inversion breakpoint location and size must be adjusted for the  
151 position and size of each respective phylogenetic series. Inversion breakpoint locations were  
152 therefore expressed as a deviation from the midpoint of the series originating inversion and  
153 inversion size was expressed as a deviation from the average inversion size for each phylogenetic  
154 series. On the standardized adjusted scale, zero represented the location of the originating  
155 inversion for each series, positive values represented a distal shift, and negative values indicated  
156 proximal movement of the derived inversion. Similarly, positive values indicates an above  
157 average size and negative values represent a smaller than average size after standardization and  
158 adjustment for each phylogenetic series.

159 Statistical analysis of the distal shift was performed by least squares regression of  
160 standardized inversion breakpoint location upon the inversion's rank in a phylogenetic series.

161 For each phylogenetic series the Muller element and species were incorporated as nested  
162 categorical variables in the regression analysis. Phylogenetic correction for the species term  
163 (incorporating non-independence of observations due to shared ancestry) is statistically  
164 inappropriate when analyzing polymorphisms unique to each species, precisely because there can  
165 be no covariation due to coancestry. Separate analyses were performed for proximal and distal  
166 inversion breakpoints with statistical significance of the regression coefficients assessed by two  
167 sided  $t$ -test for  $\beta = 0$ . A statistical test for equality of slopes was performed using  $F$ -statistics for  
168 the null hypothesis  $\beta_{proximal} = \beta_{distal}$  (Sokal and Rohlf, 1995). Statistical significance of inversion  
169 size reduction was assessed by two sided  $t$ -test for  $\beta = 0$  after regression of standardized  
170 inversion size on phylogenetic series.

171

172

## RESULTS

173 The quantitative analysis of 134 inversions in 28 phylogenetic series on 13 chromosomes  
174 from six *obscura* group species provided strong statistical support of the telomeric progression of  
175 sequentially derived inversion breakpoints (figure 2). The regression of proximal inversion  
176 breakpoint location on phylogenetic rank yielded a statistically significant regression coefficient  
177 ( $\beta=10.00$ ,  $t=4.54$ ,  $df=1$ ,  $p< 0.001$ ) (table 2). Distal inversion breakpoint location when  
178 regressed on phylogenetic rank was also statistically significant ( $\beta=7.07$ ,  $t=2.98$ ,  $df=1$   $p=0.004$ )  
179 (table 3). Variance components and the occasional statistical significance associated with nested  
180 categorical variables (species, element, series) is likely a product of standardization across  
181 chromosomes with heterogeneous map resolution and genetic length. Again phylogenetic  
182 correction for these tests is both logically and statistically inappropriate as the inversion  
183 polymorphism analyzed is unique to and arose independently in each species.





207 and rarely form phylogenetic series. When SR chromosomes do form phylogenetic series  
208 (Muller element A of *D. subobscura*, element D of *D. athabasca*), they tend to be smaller series  
209 and do not exhibit the distal shift or size reduction. It is likely that the very strong selection on  
210 sex ratios and recombination suppression associated with the strong transmission bias of SR  
211 chromosomes overwhelms the statistical signal produced the relatively weak force that drives the  
212 distal shift.

213         If the distal shift observed for autosomes in these species is just an extreme illustration of  
214 some underlying principle common to all paracentric inversion evolution, then a cytogenetic  
215 mechanism is required for this pattern. Novitski himself presented a biased mutational model  
216 after observing the non-uniform distribution of inversion breakpoints in the phylogenetic series  
217 of *D. pseudoobscura* (Bernstein and Goldschmidt, 1961; Novitski, 1946; Novitski, 1961). This  
218 ingenious model invokes a bias of spontaneous chromosome breakage in inversion heterozygotes  
219 and remains a viable explanation awaiting experimental examination. However, as Novitski  
220 noted, this model is limited to explaining the clumped distribution of inversion breakpoints and  
221 alone is insufficient to explain the distal shift, size reduction, or variability of inversion  
222 abundance (Novitski, 1946). Below I present an alternative mechanism with well-validated  
223 assumptions that addresses all these aspects of inversion polymorphism, and does not invoke the  
224 logistically untestable mutational bias assumption.

225         **Meiotic Drive Mechanism:** In *Drosophila*, recombination between different gene  
226 arrangements is effectively suppressed because crossing over produces acentric and dicentric  
227 meiotic products that for mechanical reasons are relegated to the polar body nuclei and never  
228 included in the functional egg (Hinton and Lucchesi, 1960; Sturtevant and Beadle, 1936).  
229 However, as illustrated in figure 4A, heterozygotes for overlapping inversions have a

230 homosequential region, where if crossing over were to occur, all four meiotic products would be  
231 monocentric and could in principle be included in the functional egg (figure 4B). Because of the  
232 figure eight pairing pattern (figure 4C), crossing over in meiosis I generates large deletions and  
233 duplications resulting in dyad asymmetry (figure 4B) (Sturtevant and Beadle, 1936). In  
234 *Drosophila* females, it is a thoroughly established fact that the shorter chromatid of an  
235 asymmetric dyad in meiosis II has a higher probability of being included in the functional egg  
236 (Lindsley and Sandler, 1965; Novitski and Sandler, 1956; Zimmering, 1955). The phenomenon  
237 of unequal recovery from asymmetric dyads is known as nonrandom disjunction and is a well-  
238 known form of female meiotic drive (reviewed in Novitski, 1951; Novitski, 1967).

239 For any overlapping paracentric inversions that are two steps apart in a phylogenetic  
240 series, a homosequential region exists where crossing over produces asymmetric dyads  
241 (Sturtevant and Beadle, 1936). Furthermore, for any such inversions, a single crossover event  
242 will create dyads pairing the distal inversion with the duplications and the proximal inversion  
243 with the deletions. The resulting asymmetric dyads will favor the inclusion of the chromatids  
244 carrying the distal inversion and the deletions in the functional egg. Because large chromosomal  
245 deletions and duplications generally form inviable zygotes, the final result is an over-  
246 representation of distal inversions in the viable progeny of females heterozygous for overlapping  
247 inversions.

248 This meiotic drive mechanism applies equally to included inversions (supplemental  
249 figure 2), where the asymmetric dyads generated from crossing over consist of a proximal  
250 duplication and distal deletion (or vice versa). The mechanism operates for inversions in  
251 repulsion phase (as illustrated in figure 4) or coupling phase as observed for serially inverted  
252 chromosomes (supplemental figure 3 and 4). In the latter case, the serially inverted chromosome

253 will drive against the standard arrangement only if the second inversion is distal to the first.  
254 Therefore, single crossover events in homosequential regions of any two inversions (overlapping  
255 or included, in repulsion or coupling phase) will unequivocally create a bias favoring the  
256 inclusion of distal inversions in the functional egg. I propose that it is this intrinsic bias in  
257 female meiosis that generates the distal shift in a phylogenetic series of serially inverted  
258 chromosomes. This hypothesis also explains the weak tendency towards size reduction as a by-  
259 product of favoring evermore distal inversions in subtelomeric regions where large inversions are  
260 precluded by the position of the telomere.

261 **Challenges of Drive Theory:** This meiotic drive theory of Novitski's distal shift presents  
262 several difficulties from both transmission genetic and population genetic perspectives.

263 Although crossing over in homosequential regions of overlapping inversions has been directly  
264 observed, experimental investigation has been limited to X chromosomes and requires the use of  
265 compound chromosomes or translocation stocks to recover recombinant products (Grell, 1962;  
266 Novitski and Braver, 1954; Sturtevant and Beadle, 1936). Crossing over in shared inverted  
267 regions has not yet been demonstrated for inversions of autosomes segregating in natural  
268 populations. Formal genetic analysis for the common inversions of Muller element E in *D.*  
269 *melanogaster* and Muller element C in *D. pseudoobscura* could not detect nonrandom  
270 disjunction (Meisel and Schaeffer, 2007, Koury unpublished). However, using realistic  
271 parameters for crossing over and nonrandom disjunction, expected transmission ratios do not  
272 exceed  $k = 0.513$  (Koury unpublished), a deviation that is on the same order of magnitude of  
273 viability effects of phenotypic markers used and well within the measurement error of both  
274 experiments. Nonetheless, it is not uncommon for effects below the threshold of experimental  
275 detection (*e.g.* codon bias) to have major evolutionary significance. Furthermore, there are

276 experimental refinements possible with *D. melanogaster* model system currently being pursued  
277 to enhance the ability to experimentally detect drive in this scenario.

278         More difficulty is encountered when considering the population genetics of the distal  
279 shift. The relative rarity of inversion mutations, overlapping inversion heterozygotes, and  
280 crossing over in homosequential regions (each a precondition for the next) paired with the  
281 relatively weak strength of drive and the underdominance of overlapping inversion heterozygotes  
282 (due to dominant lethal deletion and duplications), suggests a small role for nonrandom  
283 disjunction in paracentric inversion evolution. In considering the extension to serially inverted  
284 chromosomes, the later gene rearrangements can only drive at the expense of the earlier steps.  
285 So this force, while of plausible importance in the first, second, or third steps of a phylogenetic  
286 series, quickly becomes vanishingly small in later steps. These population genetic questions  
287 require rigorous quantitative analysis beyond the scope of this paper and are the subject of a  
288 forthcoming publication.

289         Interestingly, the challenges outlined in this section generate several predictions which  
290 are consistent with the *obscura* group data. First, the relatively weak female meiotic drive for  
291 overlapping inversions (maximum  $k = 0.513$ ) does not generate a distal shift for SR  
292 chromosomes where stronger forces are expected to prevail. Second, for the most extensive and  
293 best resolved phylogenetic series (Muller element *C* of *D. athabasca*, *D. pseudoobscura*, and *D.*  
294 *subobscura*), the ancestral arrangements and early steps tend to be rare or absent. Finally, for  
295 autosomes no series greater than four inversion steps was observed (supplement table 1) and the  
296 distal shift is relatively weak for the few inversions of rank four (figure 3).

297         **Patterns in Inversion Evolution:** It is very encouraging to note that the proposed  
298 meiotic drive mechanism bears on several other patterns in inversion polymorphism. To justify

299 experimental investigation and population genetic simulations for this scenario I enumerate some  
300 of these observations. The patterns of paracentric inversion variability mentioned in the  
301 introduction suggest this form of structural heterozygosity has autocatalytic properties (Bernstein  
302 and Goldschmidt, 1961; Novitski, 1961). The meiotic drive mechanism predicts serial inverted  
303 chromosomes, especially distally placed second inversions, have intrinsic advantages in invading  
304 a population already segregating for chromosomal rearrangements in the same genomic region.  
305 And although this advantage does not hold for advanced stages in the phylogenetic series, the  
306 approach to complete recombination suppression by favoring inversions in later stages has the  
307 second order effect of reducing genetic load due to this particular form of meiotic drive (Crow  
308 and Kimura, 1970).

309         In considering just three consecutive steps of a phylogenetic series (ancestral,  
310 intermediate, and derived), Wallace observed that the intermediate arrangement is often absent in  
311 a given population (Wallace, 1953). Wallace's "Rule of Triads" is immediately comprehensible  
312 on the view that the intermediate and derived arrangements have similar gene contents and  
313 fitness; however, the derived arrangement has the added benefit of driving against the ancestral  
314 state and thus outcompetes the intermediate arrangement. Along these same lines, the commonly  
315 observed local extirpation of arrangements of low rank in a long phylogenetic series may be  
316 related to being commonly driven against.

317         Finally, although Novitski's (1961) biased mutational model explains the clustered  
318 pattern of inversion breakpoints generating extensive inversion overlap, the meiotic drive theory  
319 offers an equally viable alternative. The drive mechanism predicts, even with uniform  
320 distribution of spontaneous inversion breakpoints, that the inversions with greatest overlap and  
321 thus greatest opportunity for nonrandom disjunction, would invade natural populations. The

322 clumped distribution of observed breakpoints would therefore be the result of biases during the  
323 establishment phase of inversion not from any spontaneous mutational bias.

324 Rates of spontaneous chromosomal inversion, and any biases thereof, are outside the  
325 scope of reasonable experimental investigation (*cf.* Yamaguchi and Mukai, 1974 for an  
326 unreasonable attempt). As a consequence it is unclear how to practically differentiate alternative  
327 theories of chromosome evolution based solely on patterns of natural inversion polymorphism.  
328 The meiotic drive theory of paracentric inversion evolution introduced here has the potential to  
329 explain with a single mechanism a number of different chromosome patterns that were  
330 previously thought to be unrelated. Furthermore, the meiotic drive theory is based on a  
331 cytogenetic mechanism that is amenable to direct experimentation, thereby conferring a high  
332 degree of testability to this model of chromosome evolution.

333 **Conclusion:** In a phylogenetic series of overlapping inversions in the *Drosophila* species  
334 of the *obscura* group derived arrangements tend to have distally shifted breakpoints resulting in  
335 smaller inversions. The distal shift, viewed *in extremis* for the hypervariable Muller element C of  
336 *D. pseudoobscura* and *D. athabsaca*, likely reflects a fundamental mechanism of paracentric  
337 inversion evolution, while the size reduction is simply a byproduct of the distal shift in  
338 subtelomeric regions. Nonrandom disjunction of overlapping inversions was demonstrated to  
339 always favor transmission of distal inversions and is hypothesized here to favor the evolution of  
340 serially inverted chromosomes. Therefore, far from being selectively beneficial, inversion  
341 polymorphism, serially inverted chromosomes, and the associated distal shift result from  
342 intrinsic biases in meiosis and generate a substantial genetic load. This novel hypothesis requires  
343 further investigation along both experimental and theoretical lines. The meiotic drive mechanism

344 proposed should be of considerable interest as it can explain Novitski's distal shift as well as  
345 several related patterns of breakpoint distribution and paracentric inversion evolution.

346

347

348

349

350

351

352

353

354

355

356

357

358

359

360

361

362

363

364

365

366



367  
368  
369  
370  
371  
372  
373  
374  
375  
376  
377  
378  
379  
380  
381  
382  
383  
384  
385  
386  
387  
388

## REFERENCES

Andolfatto P, Wall JD, Kreitman M. 1999. Unusual haplotype structure at the proximal breakpoint of *In(2L)t* in a natural population of *Drosophila melanogaster*. *Genetics* 153(3):1297-1311.

Bernstein N, Goldschmidt E. 1961. Chromosome Breakage in Structural Heterozygotes. *Am Nat* 95(885):53.

Bhutkar A, Schaeffer SW, Russo SM, Xu M, Smith TF, Gelbart WM. 2008. Chromosomal rearrangement inferred from comparisons of 12 *Drosophila* genomes. *Genetics* 179(3):1657-1680.

Brehm A, Krimbas CB. 1991. Inversion Polymorphism in *Drosophila obscura*. *J Hered* 82(2):110-117.

Cáceres M, Ranz JMa, Barbadilla A, Long M, Ruiz A. 1999a. Generation of a Widespread *Drosophila* Inversion by a Transposable Element. *Science* 285(5426):415-418.

Cáceres M, Ranz JMa, Barbadilla A, Long M, Ruiz A. 1999b. Generation of a widespread *Drosophila* inversion by a transposable element. *Science* 285(5426):415-418.

- 389 Corbett-Detig RB, Hartl DL. 2012. Population Genomics of Inversion Polymorphisms in  
390 *Drosophila melanogaster*. PLOS Genetics 8(12):e1003056.  
391
- 392 Crow JF, Kimura M. 1970. An introduction to population genetics theory. Harper & Row, New  
393 York, NY.  
394
- 395 Dobzhansky T. 1948. Genetics of natural populations. XVI. Altitudinal and seasonal changes  
396 produced by natural selection in certain populations of *Drosophila pseudoobscura* and  
397 *Drosophila persimilis*. Genetics 33(2):158.  
398
- 399 Dobzhansky T. 1950. Genetics of Natural Populations .19. Origin of Heterosis through Natural  
400 Selection in Populations of *Drosophila pseudoobscura*. Genetics 35(3):288-302.  
401
- 402 Dobzhansky T, Sturtevant AH. 1938. Inversions in the chromosomes of *Drosophila*  
403 *pseudoobscura*. Genetics 23(1):28-64.  
404
- 405 Dobzhansky TG, Epling C. 1944. Contributions to the genetics, taxonomy, and ecology of  
406 *Drosophila pseudoobscura* and its relatives. Publs Carnegie Instn, Washington, D.C.  
407
- 408 Eanes WF, Wesley C, Charlesworth B. 1992. Accumulation of P elements in minority inversions  
409 in natural populations of *Drosophila melanogaster*. Genetical Research 59(1):1-9.  
410

- 411 Fuller ZL, Haynes GD, Richards S, Schaeffer SW. 2016. Genomics of natural populations: how  
412 differentially expressed genes shape the evolution of chromosomal inversions in  
413 *Drosophila pseudoobscura*. *Genetics* 204(1):287-301.
- 414
- 415 Gong WJ, McKim KS, Hawley RS. 2005. All paired up with no place to go: pairing, synapsis,  
416 and DSB formation in a balancer heterozygote. *PLoS Genet* 1(5):e67.
- 417
- 418 Grell RF. 1962. A new model for secondary nondisjunction: the role of distributive pairing.  
419 *Genetics* 47(12):1737.
- 420
- 421 Hasson E, Eanes WF. 1996. Contrasting histories of three gene regions associated with  
422 *In(3L)Payne* of *Drosophila melanogaster*. *Genetics* 144(4):1565-1575.
- 423
- 424 Hinton CW, Lucchesi JC. 1960. A cytogenetic study of crossing over in inversion heterozygotes  
425 of *Drosophila melanogaster*. *Genetics* 45(1):87.
- 426
- 427 Houle D, Márquez EJ. 2015. Linkage disequilibrium and inversion-typing of the *Drosophila*  
428 *melanogaster* Genome Reference Panel. G3: Genes| Genomes| Genetics 5(8):1695-1701.
- 429
- 430 Jaenike J. 2001. Sex chromosome meiotic drive. *Annual Review of Ecology and Systematics*  
431 32(1):25-49.
- 432

- 433 Jones FC, Grabherr MG, Chan YF, Russell P, Mauceli E, Johnson J, Swofford R, Pirun M, Zody  
434 MC, White S. 2012. The genomic basis of adaptive evolution in threespine sticklebacks.  
435 Nature 484(7392):55-61.  
436
- 437 Kirkpatrick M, Barton N. 2006. Chromosome inversions, local adaptation and speciation.  
438 Genetics 173(1):419-434.  
439
- 440 Krimbas CB. 1992. The inversion polymorphism of *Drosophila subobscura*. In: Krimbas CB,  
441 Powell JR, editors. *Drosophila* inversion polymorphism. CRC Press, Boca Raton, FL.  
442
- 443 Krimbas CB, Powell JR. 1992. Introduction. In: Krimbas CB, Powell JR, editors. *Drosophila*  
444 inversion polymorphism. CRC Press, Boca Raton, FL.  
445
- 446 Le Poul Y, Whibley A, Chouteau M, Prunier F, Llaurens V, Joron M. 2014. Evolution of  
447 dominance mechanisms at a butterfly mimicry supergene. Nature Communications  
448 5:5644.  
449
- 450 Levitan M. 1962. Spontaneous chromosome aberrations in *Drosophila robusta*. Proceedings of  
451 the National Academy of Sciences 48(6):930-937.  
452
- 453 Levitan M, Etges WJ. 2009. Rapid response to perturbation of chromosome frequencies in  
454 natural populations of *Drosophila robusta*. Genetica 137(1):1.  
455

- 456 Lewontin RC. 1981. The scientific work of Theodosius Dobzhansky. In: Lewontin RC, Moore  
457 JA, Provine WB, Wallace B, editors. Dobzhansky's genetics of natural populations I-  
458 XLIII. Columbia University Press, New York, NY.
- 459
- 460 Lindsley D, Sandler L. 1965. Meiotic behavior of tandem metacentric compound X  
461 chromosomes in *Drosophila melanogaster*. *Genetics* 51(2):223.
- 462
- 463 Lowry DB, Willis JH. 2010. A widespread chromosomal inversion polymorphism contributes to  
464 a major life-history transition, local adaptation, and reproductive isolation. *PLoS Biol*  
465 8(9):e1000500.
- 466
- 467 Matzkin LM, Merritt TJS, Zhu CT, Eanes WF. 2005. The structure and population genetics of  
468 the breakpoints associated with the cosmopolitan chromosomal inversion *In(3R)Payne* in  
469 *Drosophila melanogaster*. *Genetics* 170(3):1143-1152.
- 470
- 471 Meisel RP, Schaeffer SW. 2007. Meiotic transmission of *Drosophila pseudoobscura*  
472 chromosomal arrangements. *PloS one* 2(6):e530.
- 473
- 474 Novitski E. 1946. Chromosome Variation in *Drosophila athabasca*. *Genetics* 31(5):508-524.
- 475
- 476 Novitski E. 1951. Non-random disjunction in *Drosophila*. *Genetics* 36(3):267.
- 477
- 478 Novitski E. 1961. Chromosome Breakage in Inversion Heterozygotes. *Am Nat* 95(885):250.

- 479
- 480 Novitski E. 1967. Nonrandom disjunction in *Drosophila*. Annual review of genetics 1(1):71-86.
- 481
- 482 Novitski E, Braver G. 1954. An analysis of crossing over within a heterozygous inversion in
- 483 *Drosophila melanogaster*. Genetics 39(2):197-209.
- 484
- 485 Novitski E, Sandler L. 1956. Further notes on the nature of non-random disjunction in
- 486 *Drosophila melanogaster*. Genetics 41(2):194.
- 487
- 488 Orengo D, Puerma E, Papaceit M, Segarra C, Aguadé M. 2015. A molecular perspective on a
- 489 complex polymorphic inversion system with cytological evidence of multiply reused
- 490 breakpoints. Heredity 114(6):610-618.
- 491
- 492 Provine WB. 1981. Origins of the genetics of natural populations series. In: Lewontin RC,
- 493 Moore JA, Provine WB, Wallace B, editors. Dobzhansky's genetics of natural
- 494 populations I-XLIII. Columbia University Press, New York, NY.
- 495
- 496 Puerma E, Orengo DJ, Salguero D, Papaceit M, Segarra C, Aguadé M. 2014. Characterization of
- 497 the breakpoints of a polymorphic inversion complex detects strict and broad breakpoint
- 498 reuse at the molecular level. Molecular biology and evolution:msu177.
- 499

- 500 Ranz JM, Maurin D, Chan YS, Von Grotthuss M, Hillier LW, Roote J, Ashburner M, Bergman  
501 CM. 2007. Principles of genome evolution in the *Drosophila melanogaster* species  
502 group. PLoS Biol 5(6):e152.
- 503
- 504 Schaeffer SW. 2008. Selection in heterogeneous environments maintains the gene arrangement  
505 polymorphism of *Drosophila pseudoobscura*. Evolution 62(12):3082-3099.
- 506
- 507 Schaeffer SW, Bhutkar A, McAllister BF, Matsuda M, Matzkin LM, O'Grady PM, Rohde C,  
508 Valente VL, Aguadé M, Anderson WW. 2008. Polytene chromosomal maps of 11  
509 *Drosophila* species: the order of genomic scaffolds inferred from genetic and physical  
510 maps. Genetics 179(3):1601-1655.
- 511
- 512 Schaeffer SW, Goetting-Minesky MP, Kovacevic M, Peoples JR, Graybill JL, Miller JM, Kim  
513 K, Nelson JG, Anderson WW. 2003. Evolutionary genomics of inversions in *Drosophila*  
514 *pseudoobscura*: evidence for epistasis. Proceedings of the National Academy of Sciences  
515 100(14):8319-8324.
- 516
- 517 Sniegowski PD, Charlesworth B. 1994. Transposable element numbers in cosmopolitan  
518 inversions from a natural population of *Drosophila melanogaster*. Genetics 137(3):815-  
519 827.
- 520
- 521 Sokal RR, Rohlf FJ. 1995. Biometry : the principles and practice of statistics in biological  
522 research. W. H. Freeman and Company, New York, NY.

523

524 Sturtevant A, Novitski E. 1941. The homologies of the chromosome elements in the genus

525 *Drosophila*. *Genetics* 26(5):517.

526

527 Sturtevant AH. 1917. Genetic Factors Affecting the Strength of Linkage in *Drosophila*. *Proc*

528 *Natl Acad Sci U S A* 3(9):555-558.

529

530 Sturtevant AH. 1921. The North American species of *Drosophila*. *Publs Carnegie Instn,*

531 *Washington, D.C.*

532

533 Sturtevant AH, Beadle GW. 1936. The Relations of Inversions in the X Chromosome of

534 *Drosophila melanogaster* to Crossing over and Disjunction. *Genetics* 21(5):554-604.

535

536 Sturtevant AH, Dobzhansky T. 1936. Inversions in the third chromosome of wild races of

537 *Drosophila pseudoobscura*, and their use in the study of the history of the species. *P Natl*

538 *Acad Sci USA* 22:448-450.

539

540 Van Valen L, Levins R. 1968. Origins of Inversion Polymorphisms. *Am Nat* 102(923p):5-&.

541

542 Wallace AG, Detweiler D, Schaeffer SW. 2011. Evolutionary history of the third chromosome

543 gene arrangements of *Drosophila pseudoobscura* inferred from inversion breakpoints.

544 *Molecular Biology and Evolution* 28(8):2219-29.

545



- 546 Wallace AG, Detweiler D, Schaeffer SW. 2013. Molecular population genetics of inversion  
547 breakpoint regions in *Drosophila pseudoobscura*. G3: Genes| Genomes| Genetics  
548 3(7):1151-1163.
- 549
- 550 Wallace B. 1953. On coadaptation in *Drosophila*. The American Naturalist 87(837):343-358.
- 551
- 552 Wesley CS, Eanes WF. 1994. Isolation and Analysis of the Breakpoint Sequences of  
553 Chromosome Inversion *In(3L)Payne* in *Drosophila melanogaster*. P Natl Acad Sci USA  
554 91(8):3132-3136.
- 555
- 556 Wright S, Dobzhansky T. 1946. Genetics of natural populations. XII. Experimental reproduction  
557 of some of the changes caused by natural selection in certain populations of *Drosophila*  
558 *pseudoobscura*. Genetics 31(2):125.
- 559
- 560 Yamaguchi O, Mukai T. 1974. Variation of Spontaneous Occurrence Rates of Chromosomal-  
561 Aberrations in Second Chromosomes of *Drosophila melanogaster*. Genetics 78(4):1209-  
562 1221.
- 563
- 564 Zimmering S. 1955. A genetic study of segregation in a translocation heterozygote in  
565 *Drosophila*. Genetics 40(6):809.
- 566
- 567
- 568

569 Table 1. The list of 28 phylogenetic series used in this study. Note that the 14 different  
 570 Muller elements listed constitute only 13 chromosomes as elements A and D were fused  
 571 to form the metacentric X chromosome in *D. athabasca*.

| Species                 | Muller Element | Number of Series | Number of Inversions |     |
|-------------------------|----------------|------------------|----------------------|-----|
| <i>D. subobscura</i>    | A              | 2                | 4                    |     |
| <i>D. subobscura</i>    | B              | 2                | 7                    |     |
| <i>D. subobscura</i>    | C              | 1                | 8                    |     |
| <i>D. subobscura</i>    | D              | 1                | 2                    |     |
| <i>D. subobscura</i>    | E              | 2                | 7                    |     |
| <i>D. athabasca</i>     | A              | 2                | 6                    |     |
| <i>D. athabasca</i>     | B              | 1                | 3                    |     |
| <i>D. athabasca</i>     | C              | 5                | 30                   |     |
| <i>D. athabasca</i>     | D              | 4                | 8                    |     |
| <i>D. azteca</i>        | C              | 1                | 5                    |     |
| <i>D. azteca</i>        | E              | 1                | 3                    |     |
| <i>D. obscura</i>       | C              | 2                | 7                    |     |
| <i>D. persimilis</i>    | C              | 1                | 10                   |     |
| <i>D. pseudoobscura</i> | C              | 3                | 34                   |     |
| Total                   | 6              | 14               | 28                   | 134 |

572

573

574

575 Table 2. ANOVA table for regression of proximal inversion breakpoint location on  
 576 phylogenetic rank. Data corresponds to the open symbols in figure 2.

| Source of Variation    | df  | SS       | MS      | F ratio | p       |
|------------------------|-----|----------|---------|---------|---------|
| Regression on Rank     | 1   | 5149.37  | 5149.37 | 20.58   | < 0.001 |
| Species                | 5   | 2806.09  | 561.22  | 2.24    | 0.055   |
| Element within Species | 8   | 2620.44  | 327.56  | 1.31    | 0.247   |
| Series within Element  | 14  | 6609.16  | 472.08  | 1.89    | 0.036   |
| Error                  | 105 | 26270.46 | 250.19  |         |         |
| Total                  | 133 | 53987.24 |         |         |         |

577 Table 3. ANOVA table for regression of distal inversion breakpoint location on  
578 phylogenetic rank. Data corresponds to the shaded symbols in figure 2

| Source of Variation    | <i>df</i> | <i>SS</i> | <i>MS</i> | <i>F ratio</i> | <i>p</i> |
|------------------------|-----------|-----------|-----------|----------------|----------|
| Regression on Rank     | 1         | 2574.71   | 2574.71   | 8.86           | 0.004    |
| Species                | 5         | 992.29    | 198.46    | 0.68           | 0.637    |
| Element within Species | 8         | 3008.67   | 376.08    | 1.29           | 0.254    |
| Series within Element  | 14        | 5927.14   | 423.37    | 1.46           | 0.140    |
| Error                  | 105       | 30499.63  | 290.47    |                |          |
| Total                  | 133       | 49107.05  |           |                |          |

579

580

581

582 Table 4. ANOVA table testing equality of slopes from regression of proximal and distal  
583 inversion breakpoints against phylogenetic rank. The weighted average deviation from  
584 regression ( $\bar{s}_{Y.X}^2$ ) was calculated as described in Sokal and Rohlf (1995) using summary  
585 statistics from tables 2 and 3

| Source of Variation                  | <i>df</i> | <i>SS</i> | <i>MS</i> | <i>F ratio</i> | <i>p</i> |
|--------------------------------------|-----------|-----------|-----------|----------------|----------|
| Variation among regressions          | 1         | 398.02    | 398.02    | 0.37           | 0.496    |
| Average variation within regressions | 4         | 4328.72   | 1082.18   |                |          |

586

587

588

589 Table 5. ANOVA table for regression of inversion size on phylogenetic rank. Data  
590 corresponds to figure 3.

| Source of Variation    | <i>df</i> | <i>SS</i> | <i>MS</i> | <i>F ratio</i> | <i>p</i> |
|------------------------|-----------|-----------|-----------|----------------|----------|
| Regression on Rank     | 1         | 441.62    | 441.62    | 1.55           | 0.216    |
| Species                | 5         | 16.63     | 3.33      | 0.01           | > 0.999  |
| Element within Species | 8         | 92.43     | 11.55     | 0.04           | > 0.999  |
| Series within Element  | 14        | 94.32     | 6.74      | 0.02           | > 0.999  |
| Error                  | 105       | 29886.67  | 284.63    |                |          |
| Total                  | 133       | 30355.41  |           |                |          |

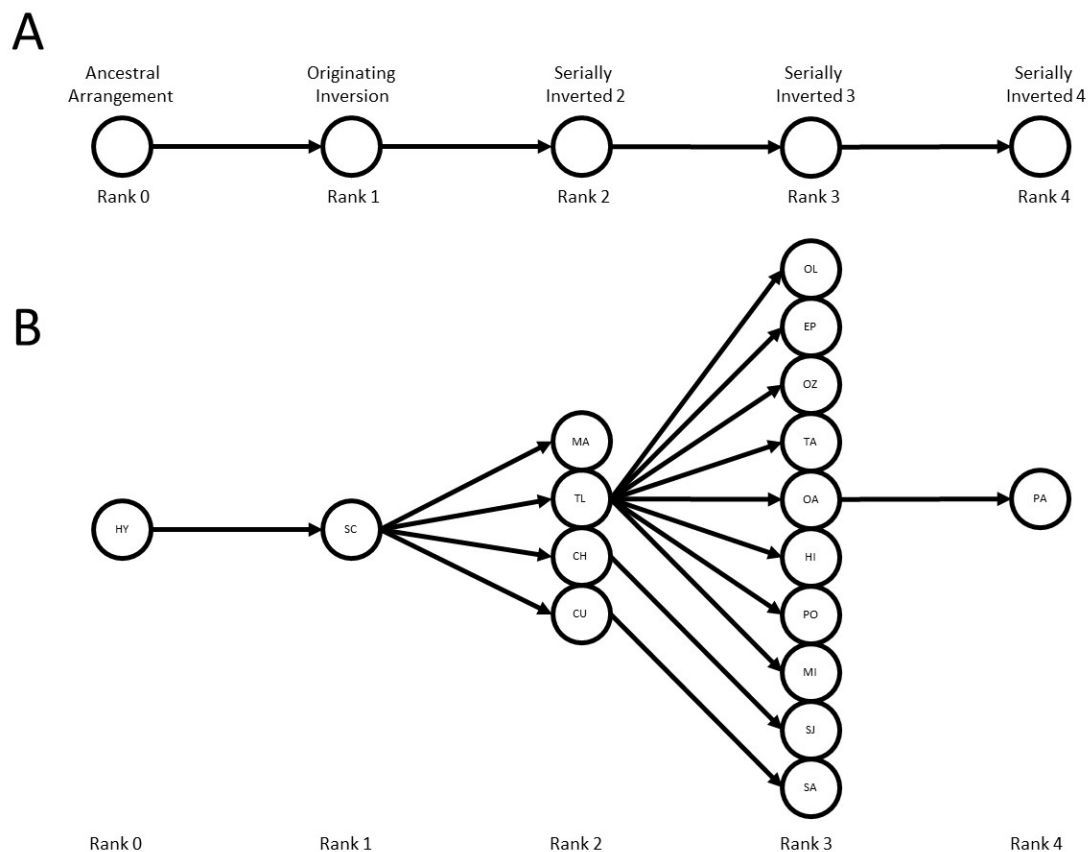

591

592

593

594

595

596

597

598

599

600

601

602

Figure 1. Schematics of phylogenetic series. A) A simple series from ancestral arrangement (rank 0), to the series originating inversion (rank 1), and then serially inverted chromosomes of rank 2 through 4. B) The “Santa Cruz” phylogenetic series of *D. pseudoobscura* chromosome III (illustrating only arrangements repeatedly observed in natural populations). Two letter codes refer to names of each gene arrangement (*cf.* Dobzhansky and Epling, 1944).

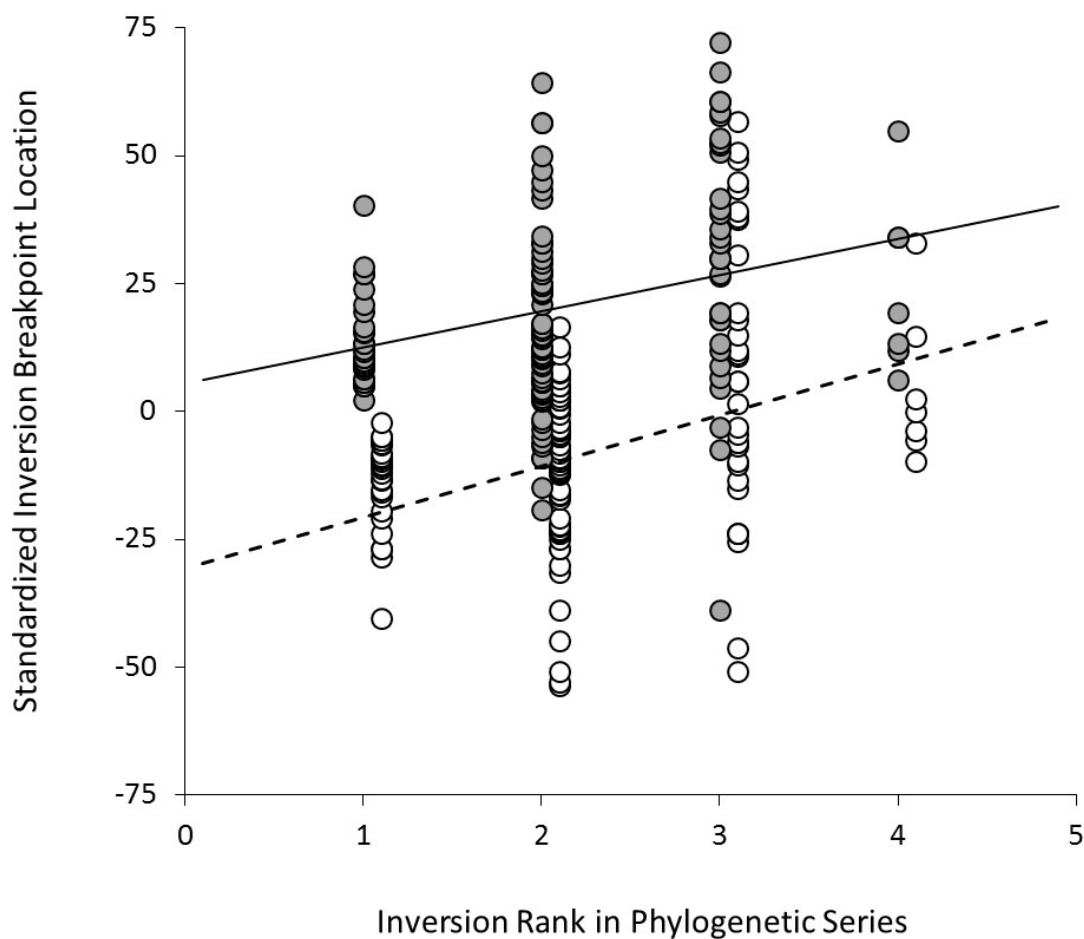

603

604

605 Figure 2. Standardized inversion breakpoint location regressed on phylogenetic rank.

606 Movement in the positive direction on the standardized scale is a movement toward the

607 telomere (a distal shift). Closed circles are the distal breakpoints, open circles are

608 proximal breakpoints (displaced by +0.1 units on the x-axis for ease of visualization).

609 Statistically significant linear regression is depicted by solid line for distal breakpoints

610 and dotted line for proximal breakpoints (table 2 and 3).

611

612

613

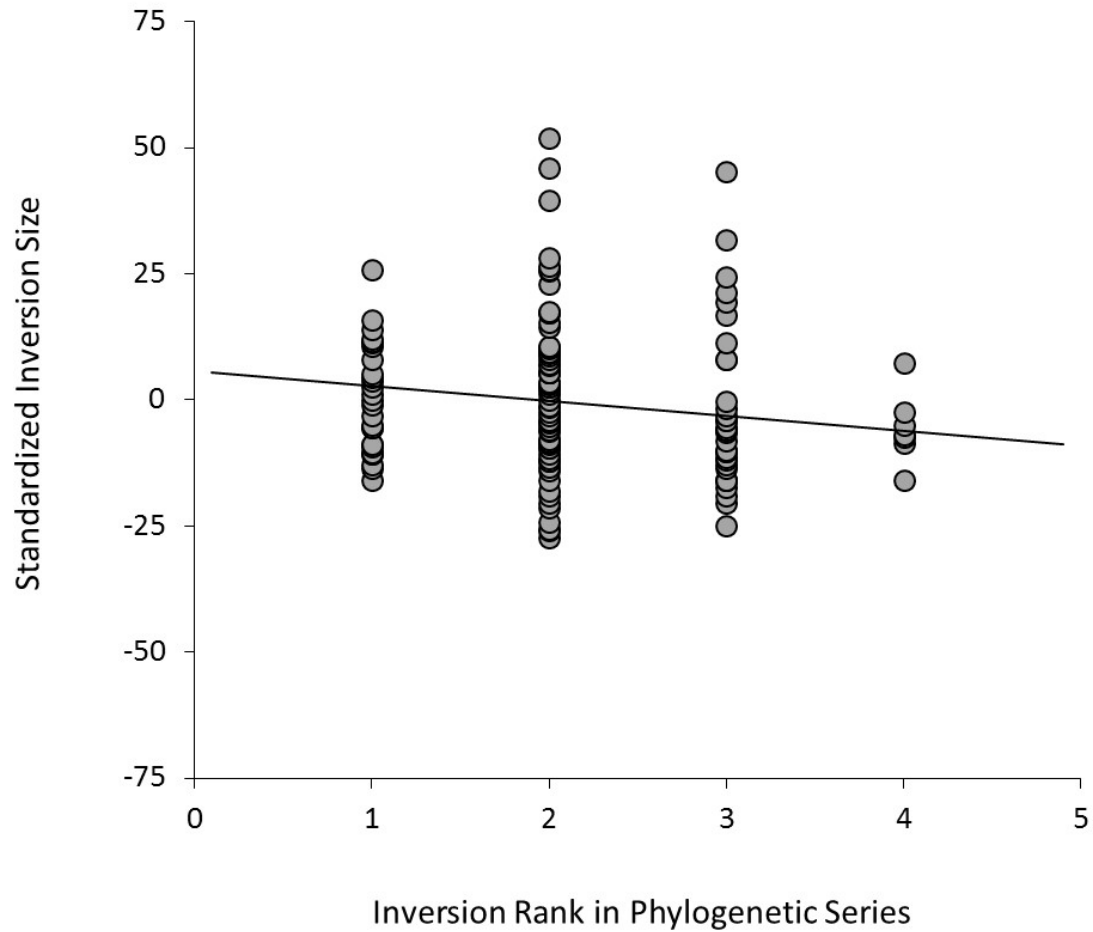

614

615

616 Figure 3. Progressive trend towards inversion size reduction in phylogenetic series. The

617 line of best fit for inversion size regressed on phylogenetic rank is depicted by solid line

618 (table 5). Regression coefficient of this line does not differ from zero with statistical

619 significance.

620

621

622

623

624

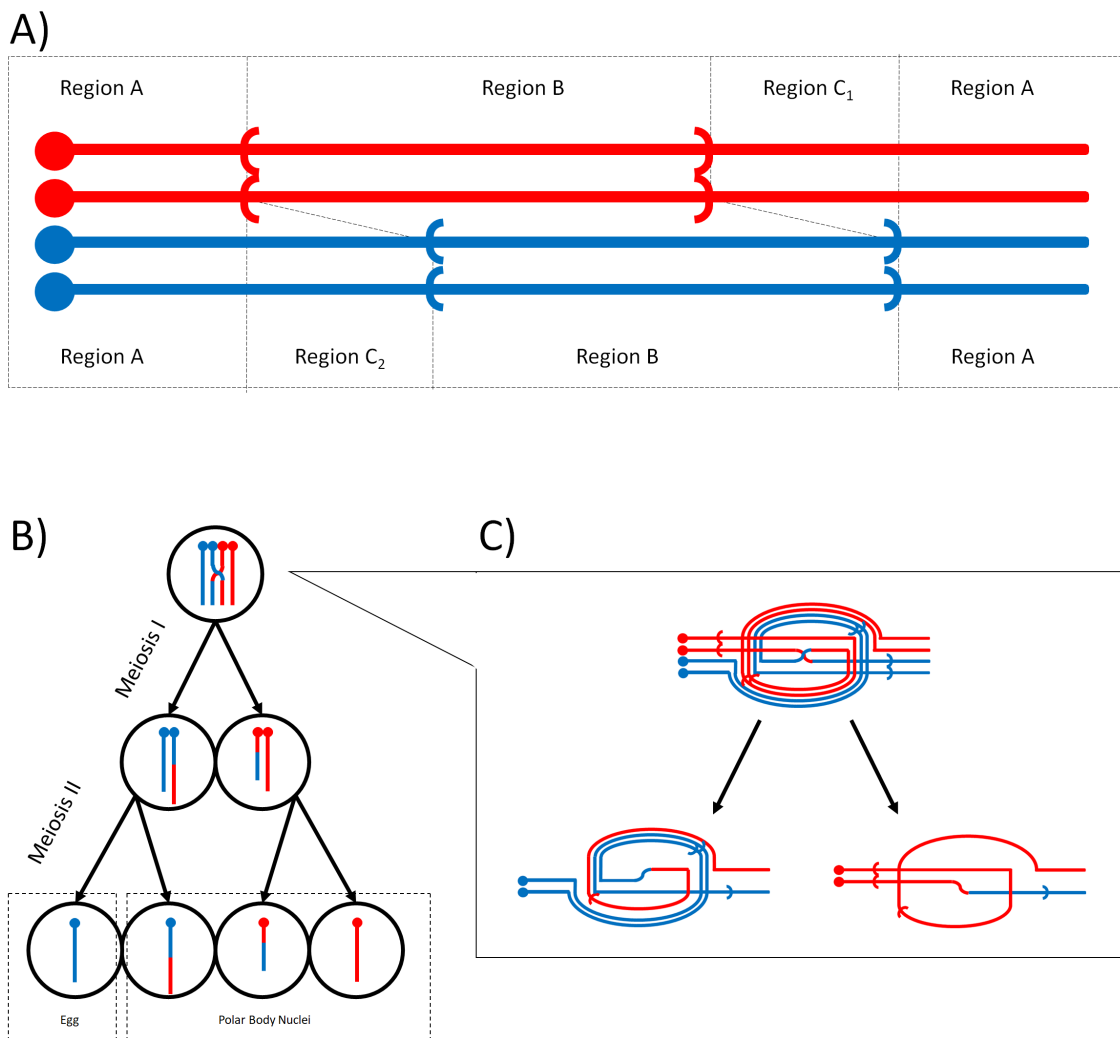

625

626

627 Figure 4. Schematic for nonrandom disjunction of overlapping inversion. A) Four strand bundle  
 628 diagram divided into homosequential regions external to inversions (Region A), regions inverted  
 629 relative to one another (Region C<sub>1</sub> and C<sub>2</sub>), and the homosequential region internal to inversions  
 630 (Region B). B) Progression of asymmetric products from a crossover in Region B through  
 631 meiosis I and II, migration of chromatids to the egg pole is probabilistic but always favors the  
 632 transmission of distal inversion (blue non-recombinant chromatid). C) Figure eight pairing of  
 633 overlapping inversions and the resulting asymmetric dyads resulting from crossing over in  
 634 Region B, illustrating all four possible meiotic products and their relative sizes.
